# Supplementary material for: TIME to think about delirium: improving detection and management on the acute medical unit
Source: PubMed Central journal article supplement — BMJ Open Qual. 2018 Aug 13;7(3):e000200. doi: 10.1136/bmjoq-2017-000200 (PMC6109807; doi:10.1136/bmjoq-2017-000200), 2018-08-13
Supplement: bmjoq-2017-000200supp002.pdf [file bmjoq-2017-000200supp002.pdf]

# TIME bundle

Name: \_\_\_\_\_  
Date of birth: \_\_\_\_\_  
CHI number: \_\_\_\_\_

Date: / /  
Zero time: :

Practitioner name: \_\_\_\_\_ Practitioner signature: \_\_\_\_\_

Designation: \_\_\_\_\_

| Initiate TIME within 2 hours<br>(initial and write time of completion)                             | Assessed/<br>sent | Results<br>seen | Abnormality<br>found |
|----------------------------------------------------------------------------------------------------|-------------------|-----------------|----------------------|
| <b>Think exclude and treat possible triggers</b>                                                   |                   |                 |                      |
|                                                                                                    |                   |                 |                      |
|                                                                                                    |                   |                 |                      |
| <b>T</b>                                                                                           |                   |                 |                      |
|                                                                                                    |                   |                 |                      |
|                                                                                                    |                   |                 |                      |
|                                                                                                    |                   |                 |                      |
| <b>Investigate and intervene to correct underlying causes</b>                                      |                   |                 |                      |
|                                                                                                    |                   |                 |                      |
|                                                                                                    |                   |                 |                      |
| <b>I</b>                                                                                           |                   |                 |                      |
|                                                                                                    |                   |                 |                      |
|                                                                                                    |                   |                 |                      |
| <b>Management Plan</b>                                                                             |                   |                 | <b>Completed</b>     |
| <b>M</b>                                                                                           |                   |                 |                      |
| <b>Engage and Explore</b> (complete within 2 hours or if family/carer not present within 24 hours) |                   |                 |                      |
|                                                                                                    |                   |                 |                      |
| <b>E</b>                                                                                           |                   |                 |                      |
|                                                                                                    |                   |                 |                      |
|                                                                                                    |                   |                 |                      |
